# Supplementary material
Source: publisher figshare collection journal article supplement (https://gsapubs.figshare.com/ndownloader/files/26669591)
Supplement: Supplementary file 1 [file 26669591]

## Sheet: Sheet1
	Supplementary Data 8. Thickness and micro-SRS-XRF concentrations (means) of each replicate of melanosome extracts. Asterisk (*) denotes an outlier.
Experiment	sample	thickness (um)	Cu (µg/cm2)	Zn (µg/cm2)	Ti (µg/cm2)	Mn (µg/cm2)	Fe (µg/cm2)	Ca (µg/cm2)	P (µg/cm2)	Ni (µg/cm2)
Matured_Cu_liver	Cu_liver_1	9	52.7156	6.17413	27.479	1.2096	34.0769	8.60979	14.8663	1.67572
Matured_Cu_liver	Cu_liver_2	37	44.9594	6.60894	3.84456	3.26402	174.881	28.753	28.4784	2.13609
Matured_Cu_liver	Cu_liver_3	15	21.9368	3.49063	1.30882	1.01064	40.5467	12.6699	30.4925	2.62043
Matured_Cu_skin	Cu_skin_1	15	8.89841	10.1607	9.94147	1.42007	21.7643	544.208	155.803	1.19176
Matured_Cu_skin	Cu_skin_2	20	72.5899	19.2466	2.64237	2.11987	15.2517	342.721	79.3615	4.06785
Matured_Cu_skin	Cu_skin_3	2	2.16988	5.21642	1.43109	1.52647	17.4513	20.3599	27.2366	6.75896
Matured_DD_liver	DD_liver_1 *	50	46.7793	19.5862	9.91446	12.1409	528.255	230.29	61.4934	4.70304
Matured_DD_liver	DD_liver_2	10	4.79056	2.12715	1.08881	0.730812	43.7904	26.1168	19.4787	0.528454
Matured_DD_liver	DD_liver_3	14	1.61269	0.980643	0.492772	0.294255	11.1718	10.4768	7.2482	0.258283
Matured_DD_skin	DD_skin_1	12	0.335913	3.83779	1.05118	0.452848	4.88979	230.379	65.8219	0.464298
Matured_DD_skin	DD_skin_2	5	0.146311	1.43685	0.793228	0.358994	8.96558	88.4749	24.0595	0.208121
Matured_DD_skin	DD_skin_3	3	0.356322	1.95787	0.714786	0.382756	11.9698	9.65348	8.32167	1.44114
Untreated_liver	Untreated_liver	30	34.563	4.65285	5.25347	6.09234	287.437	13.1486	92.1055	1.95617
Untreated_skin	Untreated_skin	15	2.32143	71.9142	3.91376	1.97235	5.19149	928.22	174.007	1.38761

## Sheet: G48696
Rossi, V., Webb, S.M., and McNamara, M., 2021, Maturation experiments reveal bias in the chemistry of fossil melanosomes: Geology, v. 49, https://doi.org/10.1130/G48696.1
